# Supplementary material
Source: PubMed Central journal article supplement (PMC6990642)
Supplement: ao9b03698_si_001.pdf [file ao9b03698_si_001.pdf]

# On-Line Supporting Information

## Antibiotic Drug NanoCarriers for Probing of Multidrug ABC Membrane Transporter of *Bacillus subtilis*

Pavan Kumar Cherukuri<sup>†1</sup>, Preeyaporn Songkiatisak<sup>†1</sup>, Feng Ding<sup>†1</sup>, Jean-Michel Jault,<sup>2</sup> and

Xiao-Hong Nancy Xu<sup>\*1</sup>

<sup>1</sup>*Department of Chemistry and Biochemistry, Old Dominion University, Norfolk, Virginia 23529, USA*

<sup>2</sup>*UMR5086 CNRS/UCBLyon I, MMSB-IBCP, 7 Passage du Vercors 69367 Lyon cedex 07, France*

### On-Line Supporting Information:

**Figure S1:** Growth curve of WT BmrA cells incubated with **(A)** free Oflox; **(B)**  $2.4 \pm 0.7$ ; **(C)**  $13.0 \pm 3.1$ ; **(D)**  $92.6 \pm 4.4$  nm Oflox nanocarriers, and AgMUNH<sub>2</sub> NPs (in the absence of Oflox, control experiment).

**Figure S2:** Growth curve of  $\Delta$ BmrA cells incubated with **(A)** free Oflox; **(B)**  $2.4 \pm 0.7$ ; **(C)**  $13.0 \pm 3.1$ ; **(D)**  $92.6 \pm 4.4$  nm Oflox nanocarriers, and AgMUNH<sub>2</sub> NPs (in the absence of Oflox, control experiment).

---

<sup>†</sup> These authors contributed equally to this work.

<sup>\*</sup> To whom correspondence should be addressed: Email: [xhXu@odu.edu](mailto:xhXu@odu.edu); [www.odu.edu/~xhXu](http://www.odu.edu/~xhXu);

Tel: (757) 683-5698

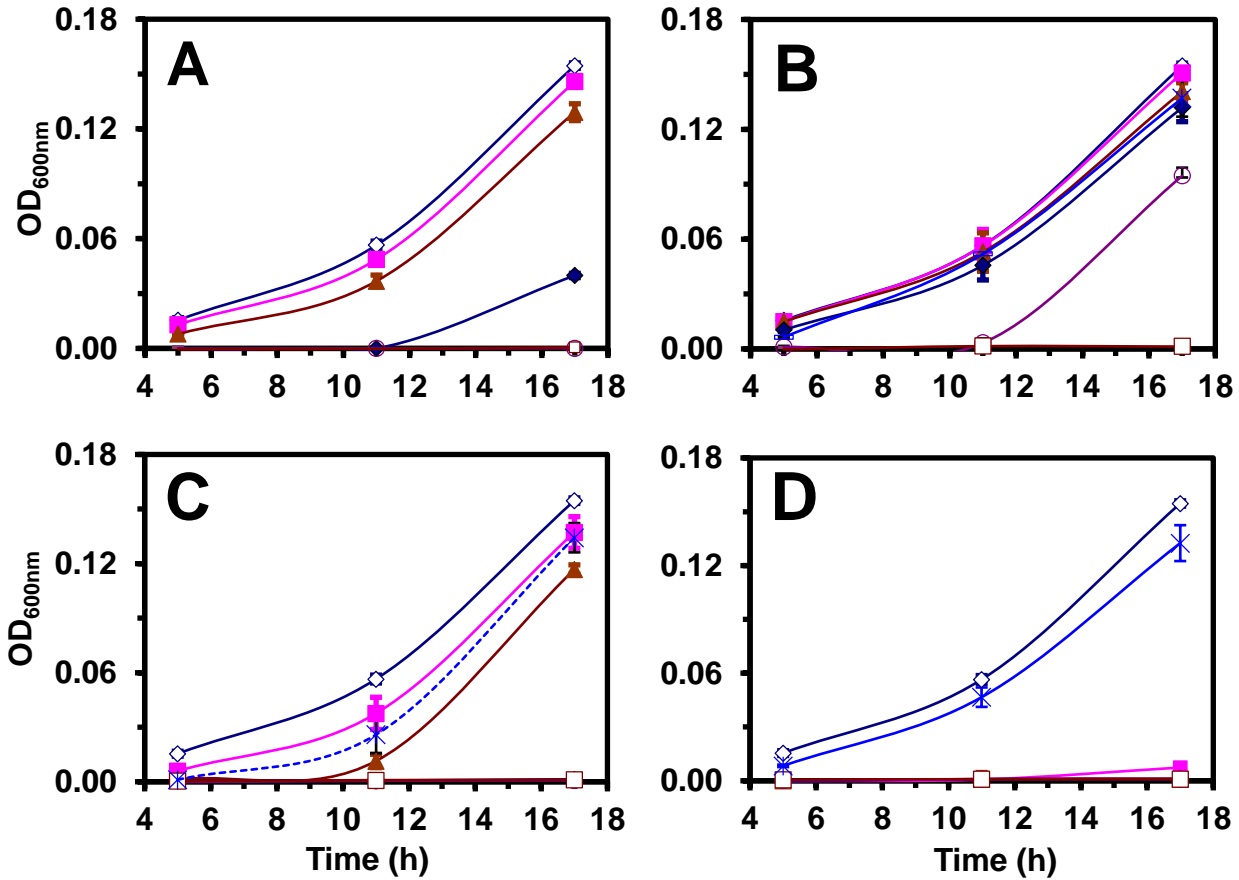

**Figure S1** : Growth curve of WT BmrA cells incubated with **(A)** free Oflx; **(B)**  $2.4 \pm 0.7$ ; **(C)**  $13.0 \pm 3.1$ ; **(D)**  $92.6 \pm 4.4$  nm Oflx nanocarriers with Oflx concentration: (◇) 0, (■) 0.055, (▲) 0.11, and (◆) 0.22; (○) 0.42, and (□) 0.72 μM; and (\*) 0.83 nM,  $7.6 \times 10^{-2}$  nM or 1.1 pM AgMUNH<sub>2</sub> NPs (in the absence of Oflx), which is the same concentration of the NPs of nanocarriers with 0.72 μM Oflx for  $2.4 \pm 0.7$ ,  $13.0 \pm 3.1$  or  $92.6 \pm 4.4$  nm NPs in (B-D), respectively.

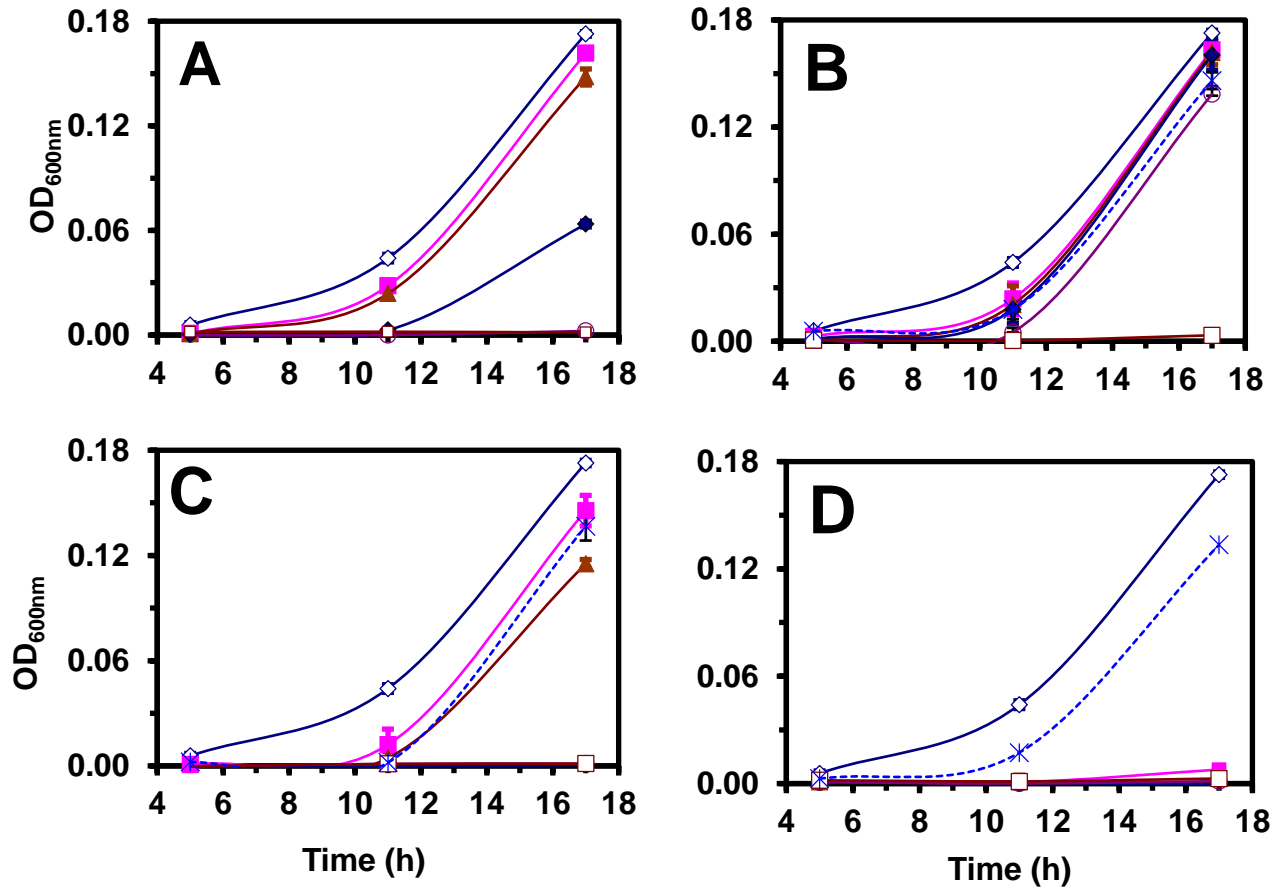

**Figure S2** : Growth curve of  $\Delta BmrA$  cells incubated with **(A)** free Ofx; **(B)**  $2.4 \pm 0.7$ ; **(C)**  $13.0 \pm 3.1$ ; **(D)**  $92.6 \pm 4.4$  nm Ofx nanocarriers with Ofx concentration: ( $\diamond$ ) 0, ( $\blacksquare$ ) 0.055, ( $\blacktriangle$ ) 0.11, and ( $\blacklozenge$ ) 0.22; ( $\circ$ ) 0.42, and ( $\square$ ) 0.72  $\mu\text{M}$ ; and ( $\ast$ ) 0.83 nM,  $7.6 \times 10^{-2}$  nM or 1.1 pM AgMUNH<sub>2</sub> NPs (in the absence of Ofx), which is the same concentration of the NPs of the nanocarriers with 0.72  $\mu\text{M}$  Ofx for  $2.4 \pm 0.7$ ,  $13.0 \pm 3.1$  or  $92.6 \pm 4.4$  nm NPs in (B-D), respectively.
